# Supplementary material for: Short-term supplementation of DHA-enriched phospholipids attenuates the nephrotoxicity of cisplatin without compromising its antitumor activity in mice
Source: Royal Society of Chemistry journal article supplement (doi:10.1039/d1fo02000e), 2021-01-01
Supplement: d1fo02000e1.pdf [file d1fo02000e1.pdf]

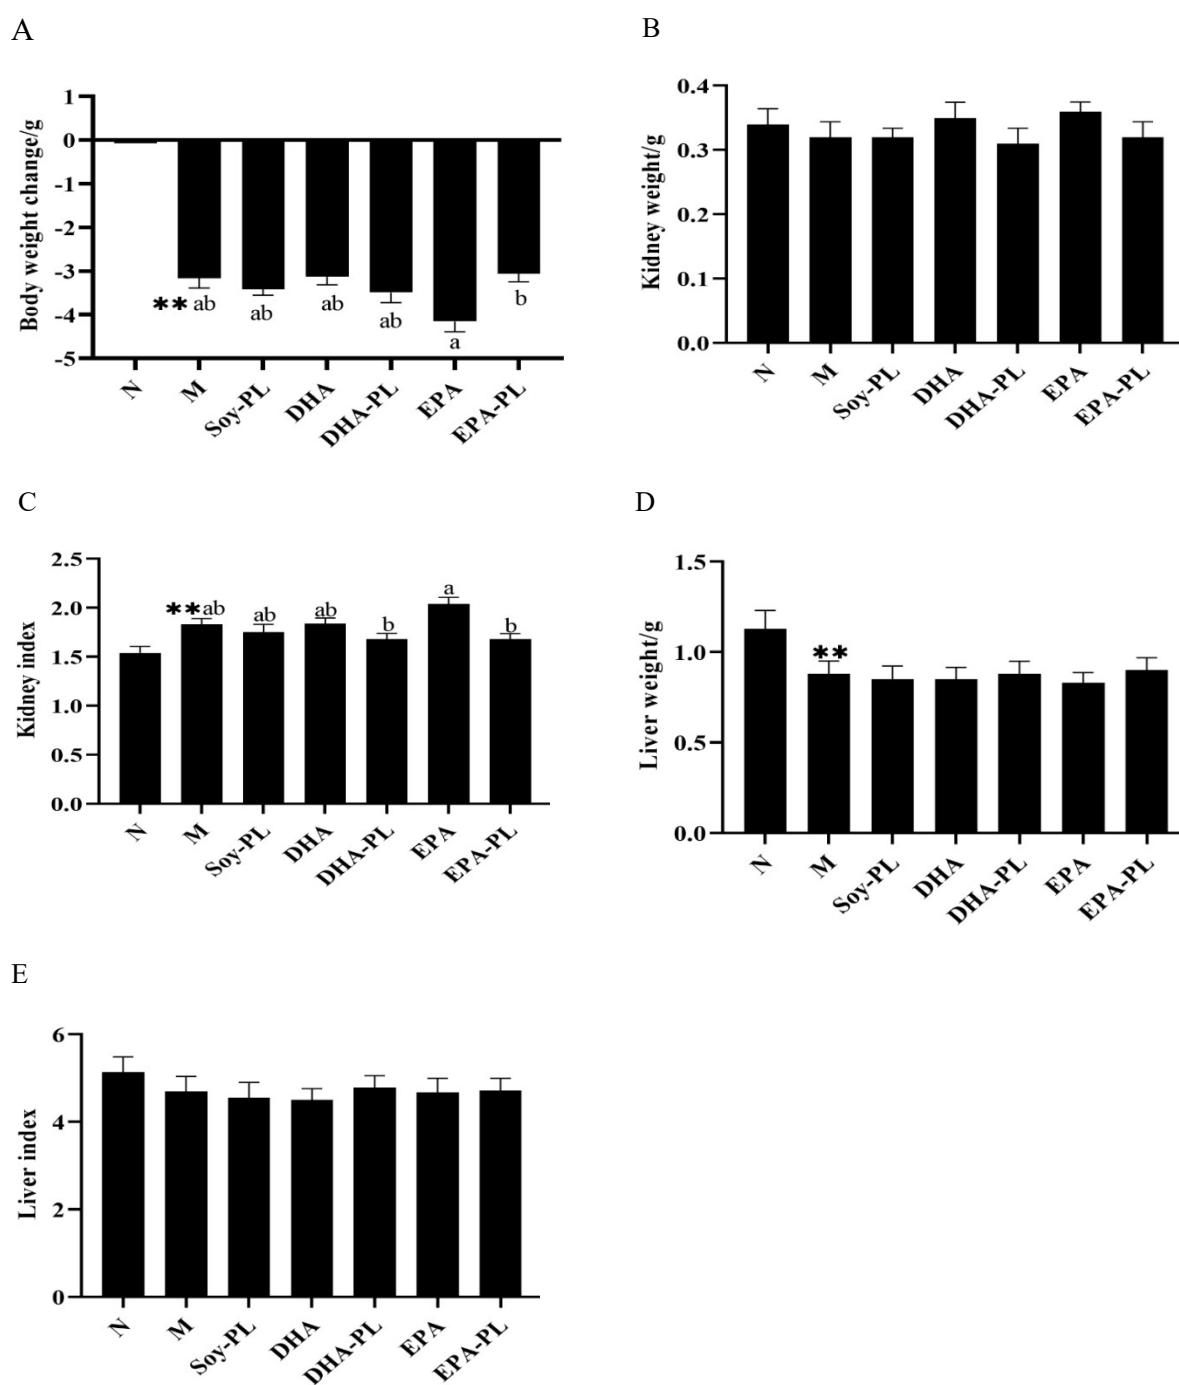

Figure S1. The effects of dietary intervention on metabolic parameters in mice (A-E). All data were expressed as mean  $\pm$  S.E.M. for 8 mice. \*\*Significantly different compared to normal group ( $p < 0.01$ ). Different letters represent significant differences between experimental groups, means with the same letter were not significantly different ( $p < 0.05$ ). Abbreviations: N: normal; M: model; Soy-PL: soybean phospholipids; DHA: docosahexaenoic acid; EPA: eicosapentaenoic acid; DHA-PL: docosahexaenoic acid-enriched phospholipids; EPA-PL: eicosapentaenoic acid-enriched

A

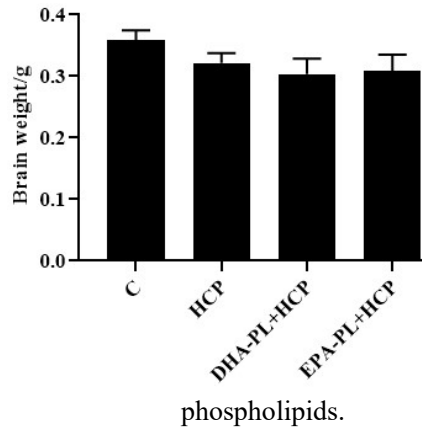

B

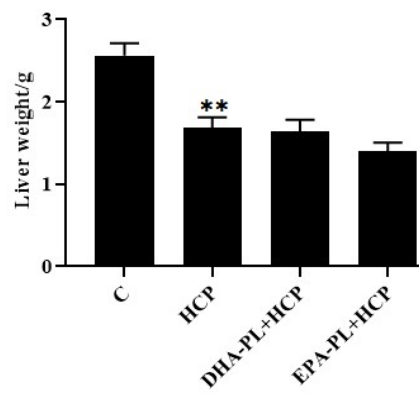

C

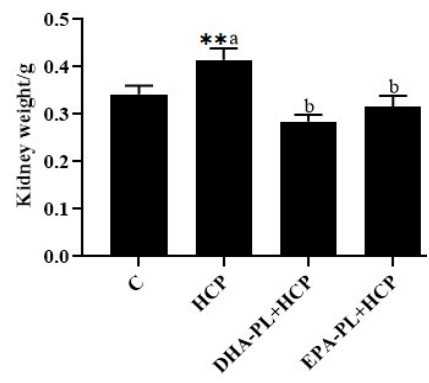

D

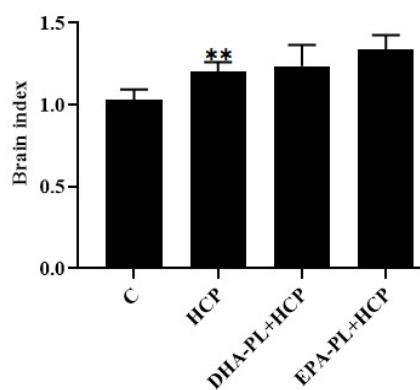

E

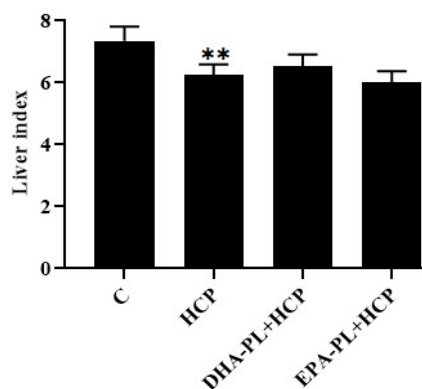

F

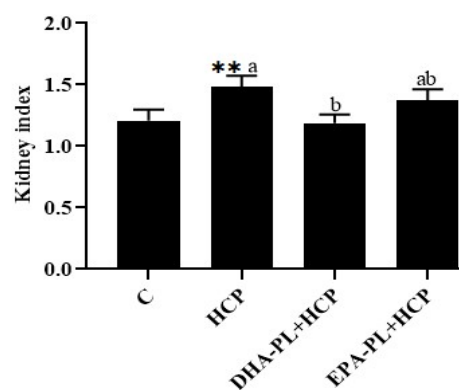

Figure S2. The effect of dietary different substances on metabolic parameters in mice (A-F). \*\*  $p < 0.01$ , a significant difference compared to the C group determined by Student's test. All data were expressed as mean  $\pm$  S.E.M. Different letters represent significant differences between experimental groups, means with the same letter were not significantly different ( $p < 0.05$ ). Abbreviations: C: control; HCP: high-dose cisplatin; DHA-PL+HCP: DHA-PL + high-dose cisplatin; EPA-PL+HCP: EPA-PL + high-dose cisplatin.
